# Supplementary material for: Analysis of a spatial orientation memory in Drosophila
Source: Springer Nature journal article supplement (doi:10.1038/nature07003), 2008-05-28
Supplement: 41586_2008_BFnature07003_MOESM269_ESM.pdf [file 41586_2008_BFnature07003_MOESM269_ESM.pdf]

## **Analysis of a spatial orientation memory in *Drosophila***

Kirsa Neuser<sup>1,2</sup>; Tilman Triphan<sup>1</sup>, Markus Mronz<sup>1</sup>, Burkard Poeck<sup>1</sup> and Roland Strauss<sup>1,2</sup>

*1 Lehrstuhl für Genetik und Neurobiologie, Biozentrum, Universität Würzburg; Am Hubland; D-97074 Würzburg; Germany*

*2 Current address: Institut für Zoologie III - Neurobiologie, Universität Mainz; Col.-Kleinmann-Weg 2; D-55099 Mainz; Germany*

### **Supplementary Information**

**Figure S1 Persistence of orientation in mutant lines with structural central complex defects.**

**Figure S2 No thoracic expression in GAL4-lines c232, c481 and c105.**

**Figure S3 Comparison of the locomotor and orientation behaviour of wild-type Canton S (CS) and *ign*<sup>58/1</sup> mutant flies in Buridan`s paradigm.**

**Table S1 Statistical tests used and their results for all figures in the main article.**

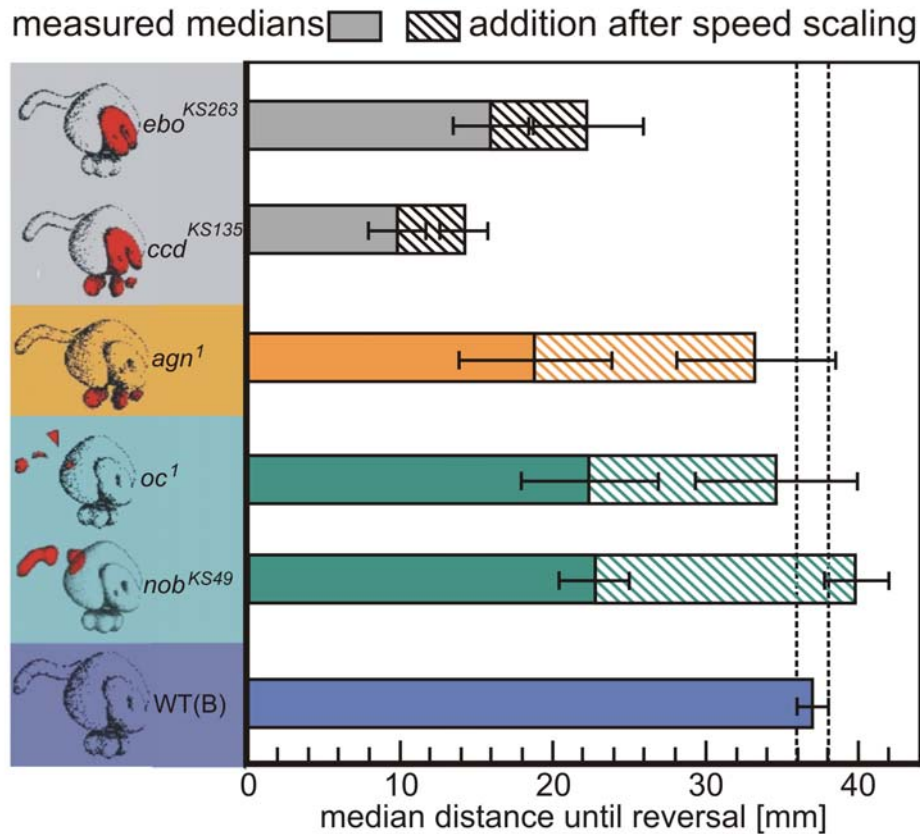

**Figure S1 Persistence of orientation in mutant lines with structural central complex defects.** Classical central complex mutant lines<sup>10</sup> were tested within the persistence-of-orientation paradigm<sup>6</sup> (no distracter). Summary sketches of their anatomical defects are given on the left side (*ebo*, *ellipsoid-body open*; *ccd*, *central complex deranged*; *agn*, *agnostic*; *oc*, *ocelliless*; *nob*, *no bridge*; WT(B), wild-type Berlin) Persistence of orientation is altered, whenever the ellipsoid body is anatomically impaired (*ebo*<sup>KS263</sup>, *ccd*<sup>KS135</sup>). Mutant lines affected in the structure of the noduli (*agn*<sup>1</sup>) or the protocerebral bridge (*oc*<sup>1</sup>, *nob*<sup>KS49</sup>) showed no alteration. Hatched portions of bars: Central complex defective flies all display lower walking speeds<sup>10</sup> than wild-type flies. Consequently, they cannot cover the same distance in a given time. Data have been normalized accordingly, taking the independently determined mean walking speeds from Buridan's paradigm<sup>8,10</sup> into account (N=10 flies, n=100 trials per genotype; error bars represent SEM values).

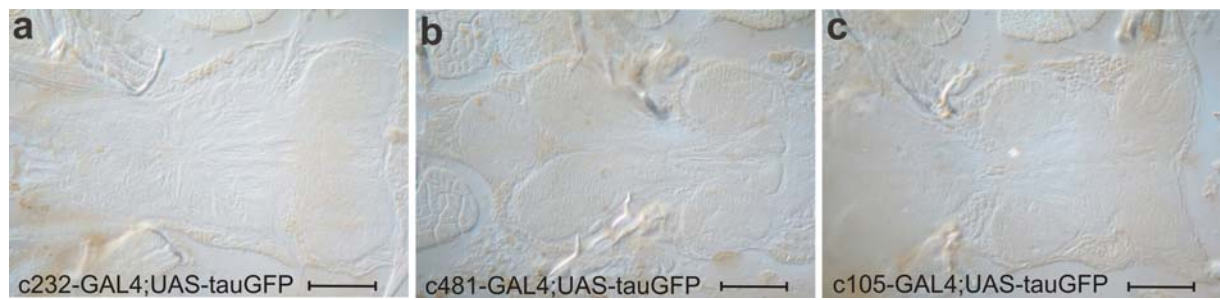

**Figure S2 No thoracic expression in GAL4-lines c232, c481 and c105.** Horizontal paraffin sections of adult fly thoraces. Expression was assessed after standard paraffin histology using a monoclonal anti-bovine TAU antibody (1:200; Sigma) as described<sup>30</sup> (scale bar = 50 $\mu$ m). **a, b, c,** Lines c232, c481 and c105, respectively, show no neuronal staining within their thoracic ganglia or in their leg neuromeres.

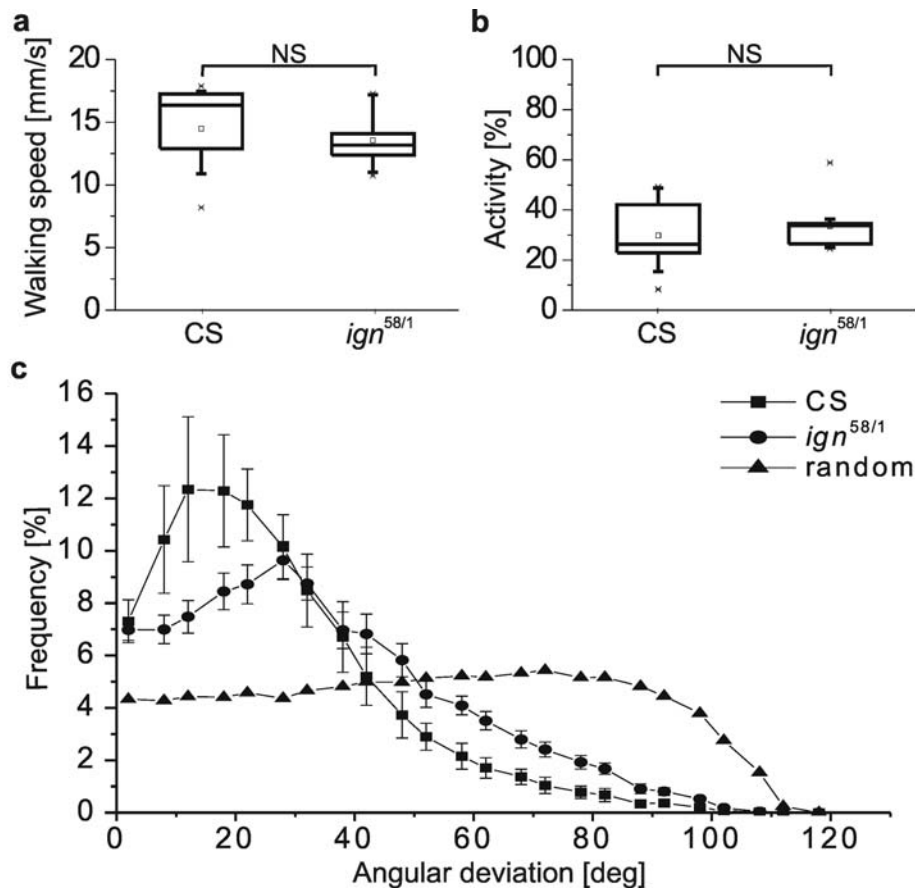

**Figure S3 Comparison of the locomotor and orientation behaviour of wild-type Canton-S (CS) and  $ign^{58/1}$  (ref. 5) mutant flies in Buridan's paradigm<sup>8,10</sup>.** Neither **a**, walking speed ( $p=0.44$ ;  $N=24, 24$ ) nor **b**, walking activity ( $p=0.44$ ;  $N=24, 24$ ) were significantly different between wild-type and mutant flies, suggesting an intact locomotor behaviour of  $ign^{58/1}$  mutant flies. **c**, The histogram shows the absolute angular deviations from the direct course toward the opposing stripes. The variances of  $ign^{58/1}$  mutant flies were not different from wild-type CS flies [ $F(24;24)=1.84$ ,  $p=0.15$ ], revealing a normal orientation ability of the *ignorant* mutant. The curve indicating random choice behaviour was generated using a Monte-Carlo calculation. **a**, **b**, Box-Whisker plots represent the median (bold line), the mean (square), 25% and 75% quartiles (box), 10% and 90% quantiles (whiskers) and extreme values (stars).

|                |                                         |                     |        |               |                        |
|----------------|-----------------------------------------|---------------------|--------|---------------|------------------------|
| <b>Fig. 1e</b> | <b>1s vs 2s vs 3s vs 4s</b>             | Kruskal-Wallis Test | H=4.47 | N=10,10,20,15 | p=0.22                 |
| <b>Fig. 1g</b> | <b>CS vs <i>ebo</i><sup>KS263</sup></b> | Mann-Whitney U-Test | U=2.5  | N=11,13       | p=6.4 10 <sup>-5</sup> |
| <b>Fig. 1g</b> | <b>HU-control vs HU</b>                 | Mann-Whitney U-Test | U=21   | N=10,10       | p=0.25                 |

|                   |                                                                                  |                                   |                  |                 |                                |
|-------------------|----------------------------------------------------------------------------------|-----------------------------------|------------------|-----------------|--------------------------------|
| <b>Fig. 2 a-c</b> | <b>+Y;UAS-TNT/+;TubGAL80<sup>ts</sup>/+ (18°C) vs (33°C)</b>                     | Sign-Test                         | Z=1.58           | N=10,10         | p=0.11                         |
| <b>Fig. 2a</b>    | <b>+Y;+;;c232-GAL4/+ (18°C) vs (33°C) but (33°C) above 58%-chance level</b>      | Sign-Test<br>One-Sample Sign Test | Z=2.33<br>t=6.19 | N=10,10<br>N=10 | p=0.02<br>p=2 10 <sup>-4</sup> |
|                   | <b>+Y;UAS-TNT/+;c232-GAL4/Tub-GAL80<sup>ts</sup> (18°C) vs (33°C)</b>            | Sign-Test                         | Z=2.85           | N=10,10         | p=0.004                        |
| <b>Fig. 2b</b>    | <b>+Y;UAS-TNT/+;c232-GAL4/Tub-GAL80<sup>ts</sup> (33°C) vs 58%-chance level</b>  | One-Sample Sign-Test              | t= -2.99         | N=10            | p=0.18                         |
|                   | <b>c481-GAL4/Y (18°C) vs (33°C)</b>                                              | Sign-Test                         | Z=1.77           | N=10,10         | p=0.08                         |
|                   | <b>c481-GAL4/Y;UAS-TNT/+;TubGAL80<sup>ts</sup>/+ (18°C) vs (33°C)</b>            | Sign-Test                         | Z=2.48           | N=10,10         | p=0.01                         |
| <b>Fig. 2c</b>    | <b>c481-GAL4/Y; UAS-TNT/+;TubGAL80<sup>ts</sup>/+ (33°C) vs 58%-chance level</b> | One-Sample Sign-Test              | t= -0.84         | N=10            | p=0.43                         |
|                   | <b>c105-GAL4/Y (18°C) vs (33°C)</b>                                              | Sign-Test                         | Z=0.35           | N=10,10         | p=0.72                         |
|                   | <b>c105-GAL4/Y;UAS-TNT/+;TubGAL80<sup>ts</sup>/+ (18°C) vs (33°C)</b>            | Sign-Test                         | Z=2.00           | N=10,10         | p=0.05                         |
|                   | <b>c105-GAL4/Y;UAS-TNT/+;TubGAL80<sup>ts</sup>/+ (33°C) vs 58%-chance level</b>  | One-Sample Sign-Test              | t= -1.59         | N=10            | p=0.15                         |

|                |                                                                         |                     |        |               |         |
|----------------|-------------------------------------------------------------------------|---------------------|--------|---------------|---------|
| <b>Fig. 3a</b> | <b>CS vs <i>ign</i><sup>58/1</sup>/Y</b>                                | Mann-Whitney U-Test | U=16.5 | N=11,10       | p=0.012 |
|                | <b>CS vs <i>dnc</i><sup>1</sup></b>                                     | Mann-Whitney U-Test | U=37   | N=11,10       | p=0.34  |
| <b>Fig. 3b</b> | <b>multiple comparison</b>                                              | Kruskal-Wallis Test | H=6.51 | N=10,14,13,10 | p=0.09  |
|                | <b><i>ign</i><sup>58/1</sup>/Y vs +Y ;;c232-GAL4/UAS-<i>ign</i>RNAi</b> | Mann-Whitney U-Test | U=31.5 | N=10,10       | p=0.27  |
|                | <b>CS vs +Y ;;c232-GAL4/UAS-<i>ign</i>RNAi</b>                          | Mann Whitney U-Test | U=30.5 | N=10,10       | p=0.09  |

|                |                                                                                                                                                                  |                     |        |                   |         |
|----------------|------------------------------------------------------------------------------------------------------------------------------------------------------------------|---------------------|--------|-------------------|---------|
| <b>Fig. 4a</b> | <b>multiple comparison</b>                                                                                                                                       | Kruskal-Wallis Test | H=8.26 | N=10 in all cases | p=0.04  |
|                | <b>+Y; +;; <i>Appl</i>-GAL4/+ vs <i>ign</i><sup>58/1</sup>/Y; UAS-<i>ign</i>/+; <i>Appl</i>-GAL4/+</b>                                                           | Mann-Whitney U-Test | U=14.5 | N=10,10           | p=0.58  |
|                | <b>+Y; +;; <i>elav</i>-GAL4/+ vs <i>ign</i><sup>58/1</sup>/Y; UAS-<i>ign</i>/+; <i>elav</i>-GAL4/+</b>                                                           | Mann-Whitney U-Test | U=27   | N=10,10           | p=0.63  |
|                | <b>+Y; +;; c232-GAL4/+ vs <i>ign</i><sup>58/1</sup>/Y; UAS-<i>ign</i>/+; c232-GAL4/+</b>                                                                         | Mann-Whitney U-Test | U=19.5 | N=10,10           | p=0.83  |
| <b>Fig. 4b</b> | <b><i>ign</i><sup>58/1</sup>/Y;; c232-GAL4/+ (18°C) vs (33°C)</b>                                                                                                | Sign-Test           | Z=0.18 | N=10,10           | p=0.86  |
|                | <b>+Y;; <i>Tub</i>-GAL80<sup>ts</sup> UAS-<i>ign</i> /+ (18°C) vs (33°C)</b>                                                                                     | Sign-Test           | Z=1.79 | N=10,10           | p=0.02  |
|                | <b><i>ign</i><sup>58/1</sup>/Y;; c232-GAL4/<i>Tub</i>-GAL80<sup>ts</sup> UAS-<i>ign</i> (18°C) vs (33°C)</b>                                                     | Sign-Test           | Z=3.33 | N=13,13           | p=0.001 |
|                | <b><i>ign</i><sup>58/1</sup>/Y ;; c232-GAL4/+ (18°C) vs <i>ign</i><sup>58/1</sup>/Y;; c232-GAL4/<i>Tub</i>-GAL80<sup>ts</sup> UAS-<i>ign</i> (18°C)</b>          | Mann-Whitney U-Test | U=48.5 | N=10,13           | p=0.36  |
|                | <b>+Y;; <i>Tub</i>-GAL80<sup>ts</sup> UAS-<i>ign</i>/+ (33°C) vs <i>ign</i><sup>58/1</sup>/Y;; c232-GAL4/<i>Tub</i>-GAL80<sup>ts</sup> UAS-<i>ign</i> (33°C)</b> | Mann-Whitney U-Test | U=46.5 | N=10,13           | p=0.85  |

Table S1 Statistical tests used and their results for all figures in the main article.
